# Supplementary material for: Identification of the Bisabolol Synthase in the Endangered Candeia Tree (Eremanthus erythropappus (DC) McLeisch)
Source: PubMed Central journal article supplement (PMC6158398; doi:10.3389/fpls.2018.01340), 2018-09-19
Supplement: Presentation_1.pdf [file Presentation_1.pdf]

*Supplementary Material*

**Identification of the bisabolol synthase in the endangered Candeia tree (*Eremanthus erythropappus* (DC) McLeisch)**

Leticia Alves Gomes Albertti, Thierry L. Delatte, Katyuce Sousa de Farias, Amanda Galdi Boaretto, Francel Verstappen, Adele van Houwelingen, Katarina Cankar, Carlos Alexandre Carollo, Harro J. Bouwmeester, Jules Beekwilder

Corresponding author

Jules Beekwilder

[jules.beekwilder@wur.nl](mailto:jules.beekwilder@wur.nl)

Supplementary table 1. Main components of Candeia tissues, at three development stages.

| RT    | RI   | Compound                                                     | Sapling (<1 year) |       |       |       | 5 year old tree |       |          |       |               |       | 10 year old tree |           |           |          |          |          |          |               | Identification method |            |            |   |            |
|-------|------|--------------------------------------------------------------|-------------------|-------|-------|-------|-----------------|-------|----------|-------|---------------|-------|------------------|-----------|-----------|----------|----------|----------|----------|---------------|-----------------------|------------|------------|---|------------|
|       |      |                                                              | Leaf              | Stem  | Root  | Twig  | Limb            | Leaf  | New root | Root  | Inflorescence | Seeds | Twig             | Limb wood | Limb Bark | New leaf | Old leaf | New root | Old root | Old root core |                       | Trunk core | Trunk bark |   |            |
| 11.80 | 1336 | Elemene                                                      | 1.20              | -     | -     | -     | -               | -     | 0.23     | -     | -             | -     | -                | -         | -         | -        | -        | -        | -        | -             | -                     | -          | -          | - | RI, MS     |
| 11.91 | 1342 | Presilphiperfol-7-ene                                        | -                 | -     | 0.38  | -     | -               | -     | 3.28     | 14.98 | -             | -     | -                | -         | -         | -        | -        | -        | -        | -             | -                     | -          | -          | - | RI, MS     |
| 12.07 | 1348 | $\alpha$ -Cubebene                                           | -                 | -     | 0.14  | -     | -               | -     | 0.70     | -     | -             | -     | -                | -         | -         | 0.22     | 0.37     | -        | -        | -             | -                     | -          | -          | - | RI, MS     |
| 12.13 | 1350 | Silphin-1-ene                                                | -                 | -     | 0.14  | -     | -               | -     | 1.17     | -     | -             | -     | -                | -         | -         | -        | -        | -        | -        | -             | -                     | -          | -          | - | RI, MS     |
| 12.44 | 1370 | Cyclosativene                                                | -                 | -     | 0.24  | -     | -               | -     | 2.70     | -     | -             | -     | -                | -         | -         | 0.45     | -        | -        | -        | -             | -                     | -          | -          | - | RI, MS     |
| 12.40 | 1379 | $\alpha$ -Copaene                                            | 30.61             | -     | 1.46  | 24.17 | -               | 16.17 | 2.23     | -     | 15.37         | -     | 1.54             | -         | -         | 23.41    | 23.40    | -        | -        | -             | -                     | -          | -          | - | RI, MS     |
| 12.60 | 1389 | $\beta$ -Elemene                                             | 4.65              | -     | 1.27  | -     | -               | 1.92  | 1.64     | -     | 1.51          | 6.98  | -                | 0.12      | -         | 1.79     | 2.46     | 0.25     | -        | 0.23          | -                     | -          | -          | - | RI, MS     |
| 12.72 | 1388 | $\alpha$ -Isocomene                                          | -                 | -     | 7.93  | -     | -               | -     | 0.70     | -     | -             | -     | -                | -         | -         | -        | -        | -        | -        | -             | -                     | -          | -          | - | RI, MS     |
| 12.79 | 1399 | sesquithujene                                                | -                 | -     | 0.28  | -     | -               | -     | 0.47     | -     | -             | -     | -                | -         | -         | -        | -        | -        | -        | -             | -                     | -          | -          | - | RI, MS     |
| 12.91 | 1402 | cyperene                                                     | -                 | -     | 9.87  | -     | -               | -     | 10.20    | 14.48 | -             | 21.85 | -                | -         | -         | -        | -        | 0.12     | -        | -             | -                     | -          | -          | - | RI, MS     |
| 12.93 | 1413 | $\alpha$ -Gurjunene                                          | 1.80              | -     | -     | -     | -               | -     | -        | -     | 2.41          | -     | -                | -         | -         | 2.02     | 1.97     | -        | -        | -             | -                     | -          | -          | - | RI, MS     |
| 13.10 | 1420 | (E)- $\beta$ -Caryophyllene                                  | 28.03             | 68.90 | 7.40  | 34.49 | -               | 28.19 | 4.30     | -     | 27.14         | -     | 1.34             | -         | -         | 23.53    | 24.63    | 0.12     | -        | -             | -                     | -          | -          | - | RI, MS, ST |
| 13.45 | 1437 | Sesquisabinene-A                                             | 0.68              | -     | 3.90  | -     | -               | -     | 2.26     | -     | -             | -     | -                | -         | -         | -        | -        | -        | -        | -             | -                     | -          | -          | - | RI, MS     |
| 13.50 | 1440 | Humulene                                                     | 3.94              | -     | 1.49  | -     | -               | 4.27  | 2.27     | -     | 3.87          | -     | -                | -         | -         | 3.36     | 2.83     | -        | -        | -             | -                     | -          | -          | - | RI, MS     |
| 13.88 | 1480 | Germacrene D                                                 | 10.72             | 31.10 | 1.99  | -     | -               | 25.53 | 2.11     | -     | 23.44         | -     | 1.77             | -         | -         | 20.17    | 19.11    | -        | -        | -             | -                     | -          | -          | - | RI, MS     |
| 14.03 | 1485 | $\beta$ -Selinene                                            | -                 | -     | 13.63 | -     | -               | -     | 1.88     | -     | -             | -     | -                | -         | -         | -        | -        | -        | -        | 0.58          | -                     | -          | -          | - | RI, MS     |
| 14.06 | 1494 | Bicyclogermacrene                                            | 4.41              | -     | 1.92  | -     | -               | 12.71 | -        | -     | 11.50         | -     | -                | -         | -         | 10.64    | 9.85     | -        | -        | 0.58          | -                     | -          | -          | - | RI, MS     |
| 14.19 | 1496 | $\alpha$ -Bisabolene                                         | -                 | -     | 29.83 | -     | -               | -     | -        | -     | -             | -     | -                | -         | -         | -        | -        | -        | -        | 0.58          | -                     | -          | -          | - | RI, MS     |
| 14.30 | 1513 | Amorphene ( $\gamma$ -cadinene)                              | 4.52              | -     | 3.22  | -     | -               | 11.21 | 4.40     | -     | 9.46          | 20.27 | -                | -         | -         | 11.27    | 9.85     | -        | -        | -             | -                     | -          | -          | - | RI, MS     |
| 15.13 | 1570 | Caryophyllene oxide                                          | 1.07              | -     | 3.97  | -     | -               | -     | -        | -     | 1.08          | -     | -                | -         | -         | -        | -        | -        | -        | -             | -                     | -          | -          | - | RI, MS     |
| 15.30 | 1592 | Presilphiperfolanol                                          | -                 | -     | 1.93  | -     | -               | -     | 24.14    | 31.11 | -             | -     | -                | -         | -         | -        | -        | -        | -        | -             | -                     | -          | -          | - | RI, MS     |
| 15.70 | 1610 | Cubenol                                                      | -                 | -     | 0.46  | -     | -               | -     | 8.44     | -     | 1.08          | -     | -                | -         | -         | -        | -        | -        | -        | -             | -                     | -          | -          | - | RI, MS     |
| 15.80 | 1636 | Cadinol                                                      | 2.97              | -     | 6.55  | -     | -               | -     | -        | -     | -             | 42.79 | -                | -         | -         | 1.57     | 3.08     | -        | -        | -             | -                     | -          | -          | - | RI, MS     |
| 15.90 | 1652 | $\alpha$ -Cadinol                                            | 2.81              | -     | -     | -     | -               | -     | 3.75     | -     | 3.20          | 8.11  | -                | -         | -         | 1.62     | 2.46     | -        | 0.60     | 0.60          | 1.97                  | -          | -          | - | RI, MS     |
| 15.96 | 1744 | Bisabololoxide                                               | -                 | -     | -     | -     | -               | -     | -        | -     | -             | -     | -                | -         | -         | -        | -        | 0.62     | 0.60     | 1.97          | -                     | -          | -          | - | RI, MS     |
| 16.27 | 1683 | (-)- $\alpha$ -bisabolol sesquiterpene lactone (Vanillosmin) | -                 | -     | -     | 26.11 | 36.59           | -     | 0.59     | 5.71  | -             | -     | 32.31            | 76.92     | 0.43      | -        | -        | 37.45    | 44.18    | 39.35         | 30.23                 | -          | -          | - | RI, MS, ST |
| 19.05 |      | Diterpene I                                                  | 2.58              | -     | 0.31  | -     | -               | -     | -        | -     | -             | -     | -                | -         | 49.79     | -        | -        | 5.26     | 7.88     | 35.88         | 46.51                 | 35.50      | -          | - | MS         |
| 19.17 |      | Diterpene I                                                  | -                 | -     | 0.99  | 15.23 | 23.65           | -     | 2.34     | 17.55 | -             | -     | 1.54             | -         | 1.42      | -        | -        | -        | 0.17     | -             | -                     | -          | -          | - | MS         |
| 19.68 |      | Diterpene II                                                 | -                 | -     | 0.66  | -     | 39.76           | -     | 20.16    | 16.17 | -             | -     | 61.54            | 22.96     | 48.36     | -        | -        | 56.18    | 46.57    | 20.83         | 23.26                 | 64.50      | -          | - | MS         |

Supplementary table 2. Primers use during this study

|                 |    |                                                  |
|-----------------|----|--------------------------------------------------|
| Q-PCR_EeBOS     | Fw | CGGGAAATTCGATTCTGGAG                             |
| Q-PCR_EeBOS     | Rv | CAAGCACCCAGGCATATT                               |
| Q-PCR_EeEF1     | Fw | GGCTGATTGTGCTGTTCTTATC                           |
| Q-PCR_EeEF1     | Rv | ACCCAAGAGTGAAAGCAAG                              |
| Chrysolaeana EF | Fw | CTGGAGGAATTGTACAAG                               |
| Chrysolaeana EF | Rv | GCTTGACCCCAAGAGTGA                               |
| EeBOS_NotI      | Rv | <u>ATATGCGGCCGCTCAAACA</u> ACTAAAGGGTGAACAACGAGC |
| EeBOS_Sall      | Fw | <u>ATATGTCGACCGATCAAAT</u> CATGTCAACTGCTTTTCCA   |
| RACE primer     |    | CAGTGTAGTGCATTATCAGTGCGAGTG                      |

Supplementary table 3. Amino acid identity (%) of six Bisabolol synthase

|       |   | 1     | 2     | 3     | 4     | 5     | 6     |
|-------|---|-------|-------|-------|-------|-------|-------|
| PdBOS | 1 | -     | 32.2  | 32.02 | 31.83 | 35.27 | 35.2  |
| AmBOS | 2 | 32.2  | -     | 98.53 | 94.14 | 48.05 | 48.35 |
| AkBOS | 3 | 32.02 | 98.53 | -     | 94.14 | 48.24 | 48.53 |
| AaBOS | 4 | 31.83 | 94.14 | 94.14 | -     | 48.05 | 48.53 |
| EeBOS | 5 | 35.27 | 48.05 | 48.24 | 48.05 | -     | 70.85 |
| MrBOS | 6 | 35.2  | 48.35 | 48.53 | 48.53 | 70.85 | -     |

AkBOS = *Artemisia kurramensis* bisabolol synthase (BAW34955.1); AaBOS= *Artemisia annua* bisabolol synthase (AFV40969.1); AmBOS= *Artemisia maritima* bisabolol synthase (BAW34954.1); McBOS= *Matricaria recutita* bisabolol synthase (AIG92846.1); PdBOS= *Phyla dulcis* bisabolol synthase (AFR23372.1)

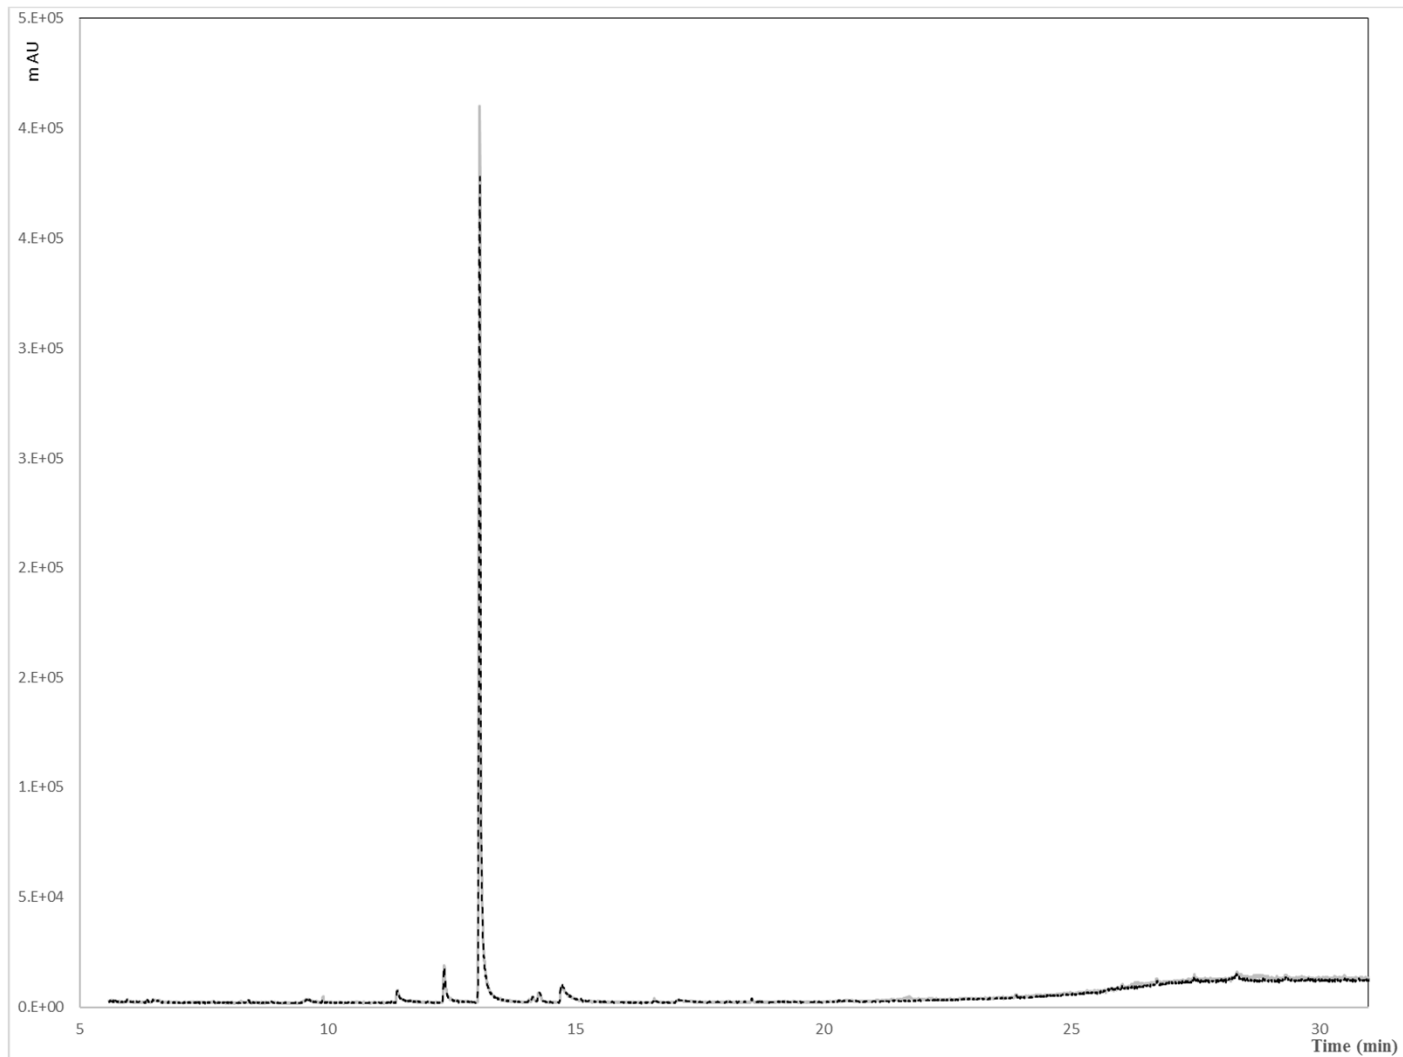

Supplementary figure 1. Detection of *in vitro* EeBOS products with GPP as a substrate. In vitro enzymatic assay with cell extracts expressing (black dotted line) or not (grey solid line) EeBOS were compared in the presence of GPP. The results were analysed by GC-MS.



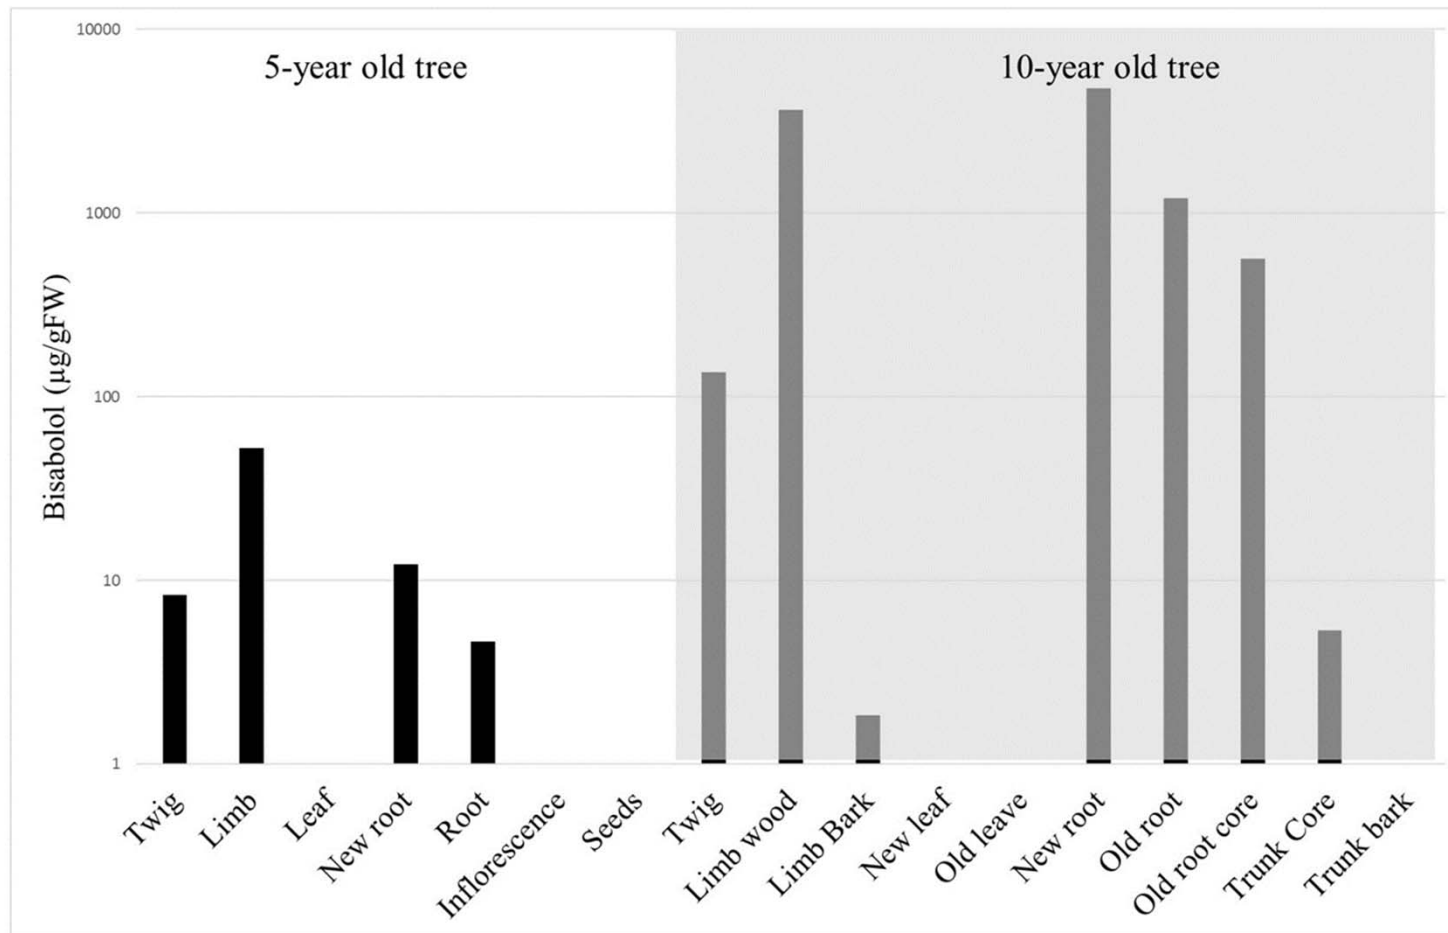

Supplementary figure 3. Bisabolol content in different tissues. (-)- $\alpha$ -Bisabolol was extracted with dichloromethane and quantified by GC-MS for different tissues originating from the 5 and 10-year old trees. Each bar represents a single analysis. The grayed out area of the bar diagram represent sample originating from the 10-year old tree. Each bar represents a single analysis.

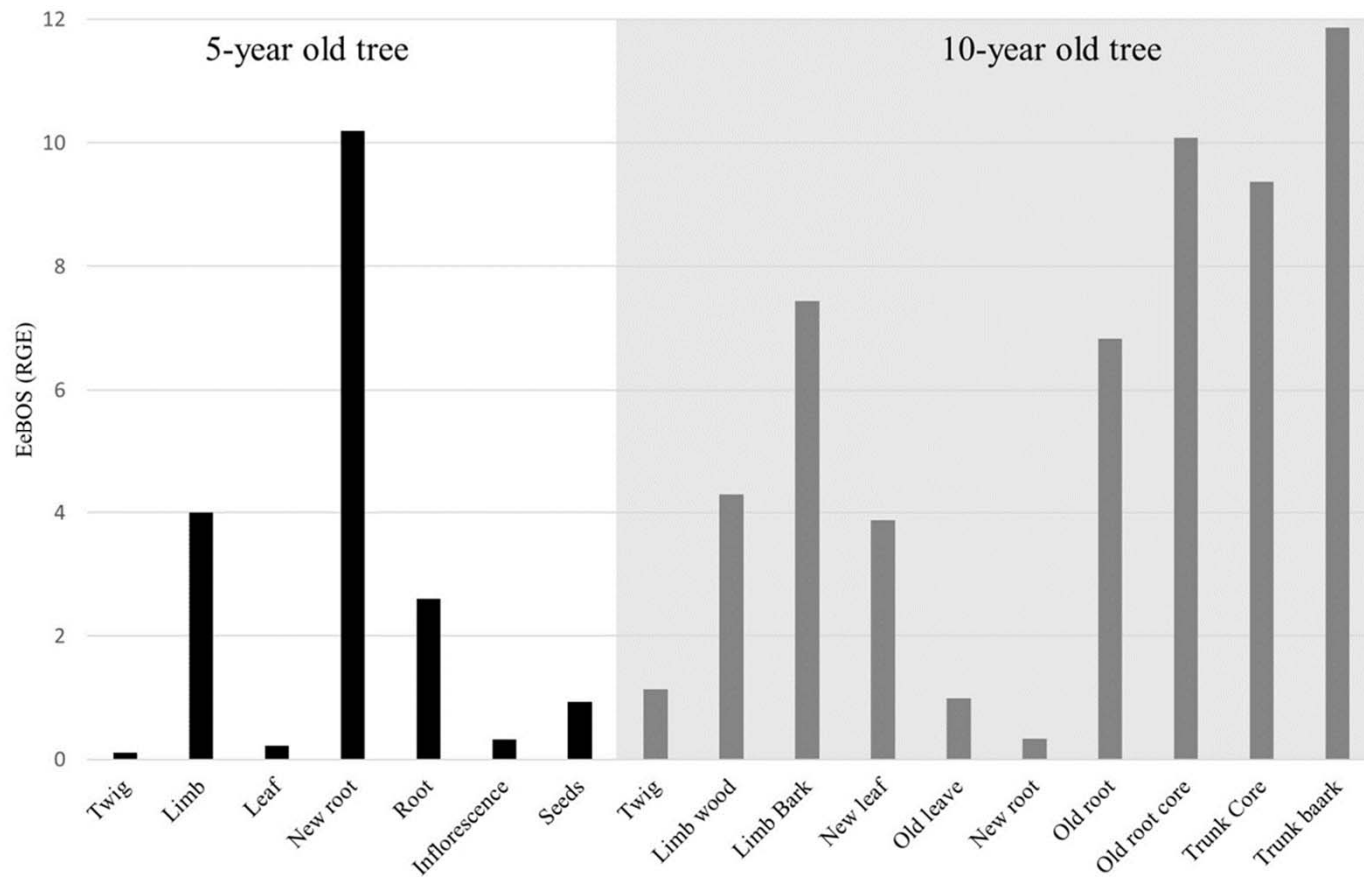

Supplementary figure 4. Relative gene expression of EeBOS in different tissues. The reference gene used was EeEF1. The grayed out area of the bar diagram represent sample originating from the 10-year old tree. Each bar represents a single analysis.
